# Supplementary material
Source: PubMed Central journal article supplement (PMC3064491)
Supplement: NIHMS250431-supplement-2.pdf [file NIHMS250431-supplement-2.pdf]

## Supplementary Information

### Supplementary Figure 1

**a**

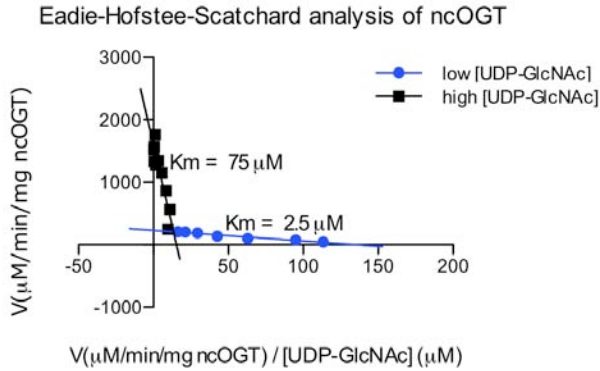

**b**

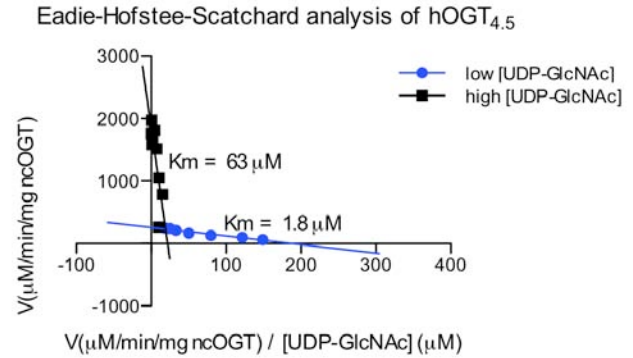

**c**

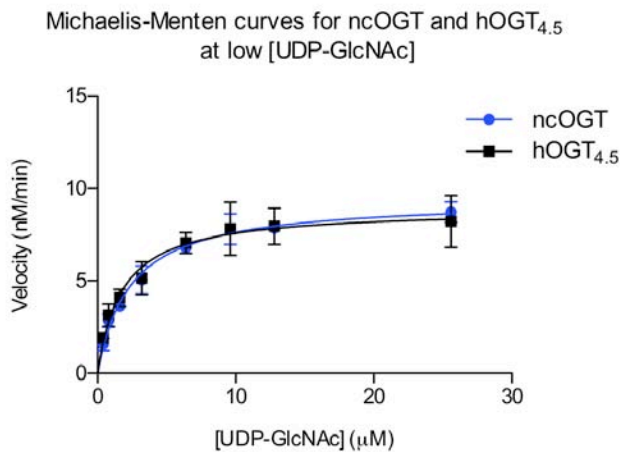

**d**

| Kinetic constants                                             | ncOGT            | hOGT <sub>4.5</sub> |
|---------------------------------------------------------------|------------------|---------------------|
| $K_m$ UDP-GlcNAc ( $\mu\text{M}$ )                            | $2.3 \pm 0.36$   | $1.8 \pm 0.47$      |
| $k_{\text{cat}}$ ( $\text{min}^{-1}$ )                        | $0.29 \pm 0.012$ | $0.22 \pm 0.015$    |
| $k_{\text{cat}} / K_m$ ( $\text{min}^{-1} \mu\text{M}^{-1}$ ) | $0.12 \pm 0.014$ | $0.13 \pm 0.025$    |

**Supplementary Figure 1. Kinetics of ncOGT and hOGT<sub>4.5</sub> with the CKII3K peptide.** Assays were performed using 3 mM CKII3K peptide<sup>1,2</sup> while varying the concentration of UDP-<sup>14</sup>C-GlcNAc (diluted with cold UDP-GlcNAc as required). Reactions were run for 30 min at room temperature with 32 nM of ncOGT and 40 nM of hOGT<sub>4.5</sub> for the lower concentrations of UDP-GlcNAc (between 0.4 and 50  $\mu\text{M}$ ) and 600 nM enzyme for the higher  $K_m$  measurements (for UDP-GlcNAc between 50  $\mu\text{M}$  and 4 mM). Data were analyzed by GraphPad Prism5. **a and b**, Eadie-Hofstee plots of ncOGT and hOGT<sub>4.5</sub>, respectively. Two distinct  $K_m$ s for UDP-GlcNAc are observed. For greater accuracy, the  $K_m$  values shown on the plots were determined by nonlinear regression analysis of the velocity versus substrate concentration curves (see **1c** for an example). **c**, ncOGT and hOGT<sub>4.5</sub> at saturating (3mM) CKII3K peptide concentrations and UDP-GlcNAc concentrations below 30  $\mu\text{M}$ , performed in duplicate. At UDP-GlcNAc levels below 30  $\mu\text{M}$ , ncOGT and hOGT<sub>4.5</sub> display Michaelis-Menten behavior. Except for the data shown in Supplementary Figs. 1a and 1b, all kinetic experiments described in the manuscript were carried out at [UDP-GlcNAc] below 30  $\mu\text{M}$ . (Graphpad Prism5; average  $\pm$  s.e.m.,  $n=2$ ) **d**, Kinetic constants derived from the data shown in **c**. The lower  $K_m$  value for UDP-GlcNAc is similar to previously reported values.<sup>1,3</sup> (Graphpad Prism5; average  $\pm$  s.e.m.,  $n=2$ , error calculated from nonlinear regression of entire curve in duplicate).

## Supplementary Figure 2

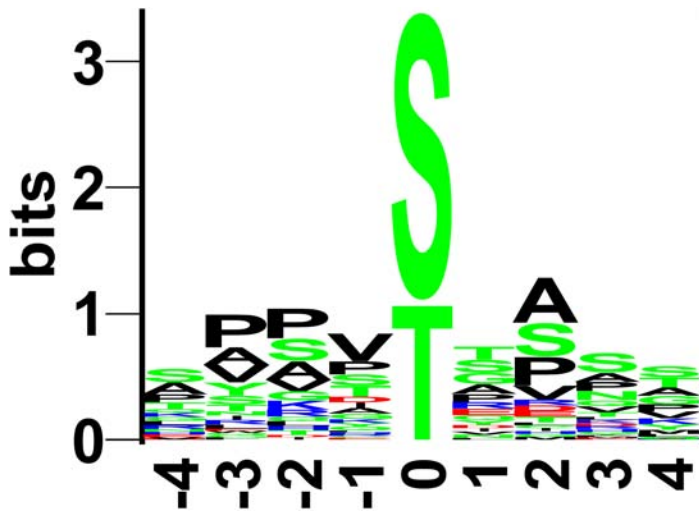

**Supplementary Figure 2. A sequence logo generated from proteins where the exact site of O-GlcNAcylation is known.** The peptide sequences are listed in Supplementary Table 4. The peptides were aligned such that the glycosylation site is in the middle at the 0 position, and the sequence was then truncated to include only 4 residues to the N terminus of the glycosylation site (“-4”) through 4 residues to the C-terminus of the site (“4”). The logo was generated using the online program “Protein Sequence Logos using Relative Entropy”<sup>5,6</sup>.

### Supplementary Figure 3

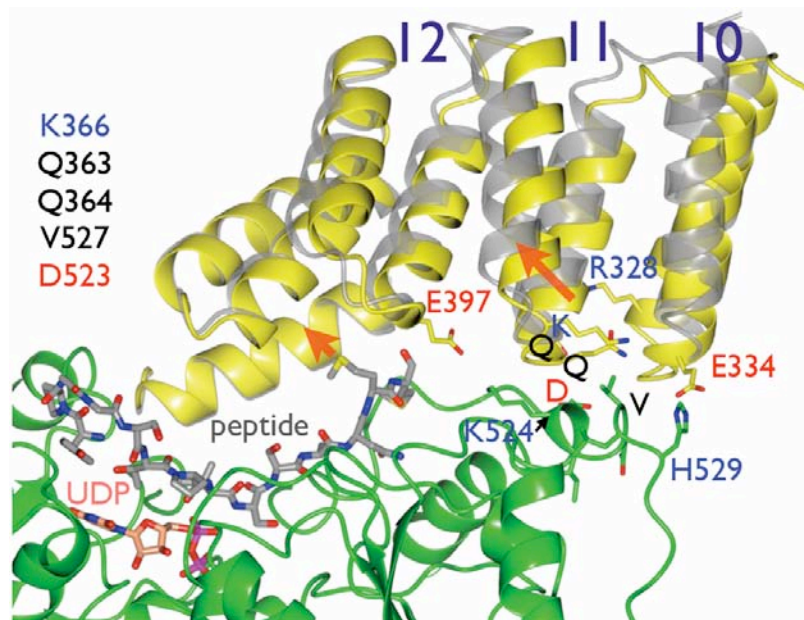

**Supplementary Figure 3. Opening of the active site cleft.** Superposition of the OGT-UDP structure (yellow) and the OGT-UDP-peptide structure (gray) shows the movement of the TPRs upon substrate binding. The peptide (shown as a gray stick model) juts into TPR 12 (left arrow), which hinges open the cleft. Opening of the cleft is due to a hinge-like movement between TPRs 12 and 13, which results in a 6 Å shift of TPR 10 away from the catalytic domain compared with the OGT-UDP structure. In the OGT-UDP structure, the first two TPR repeats of the hOGT<sub>4.5</sub> construct (corresponding to TPRs 10 and 11 of ncOGT) make several contacts with the sidechains of helix H2, such as H529 and E334, in order to keep the TPR domain latched to the catalytic region.

## Supplementary Figure 4

**a**

Production inhibition of ncOGT by UDP  
at saturating peptide concentrations

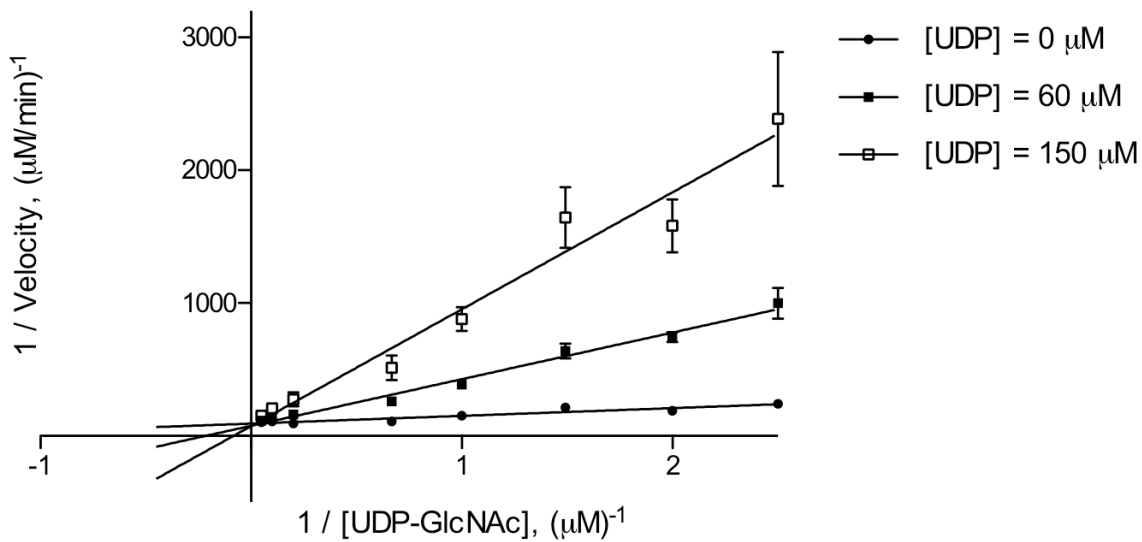

**b**

Production inhibition of ncOGT by UDP  
at unsaturating UDP-GlcNAc

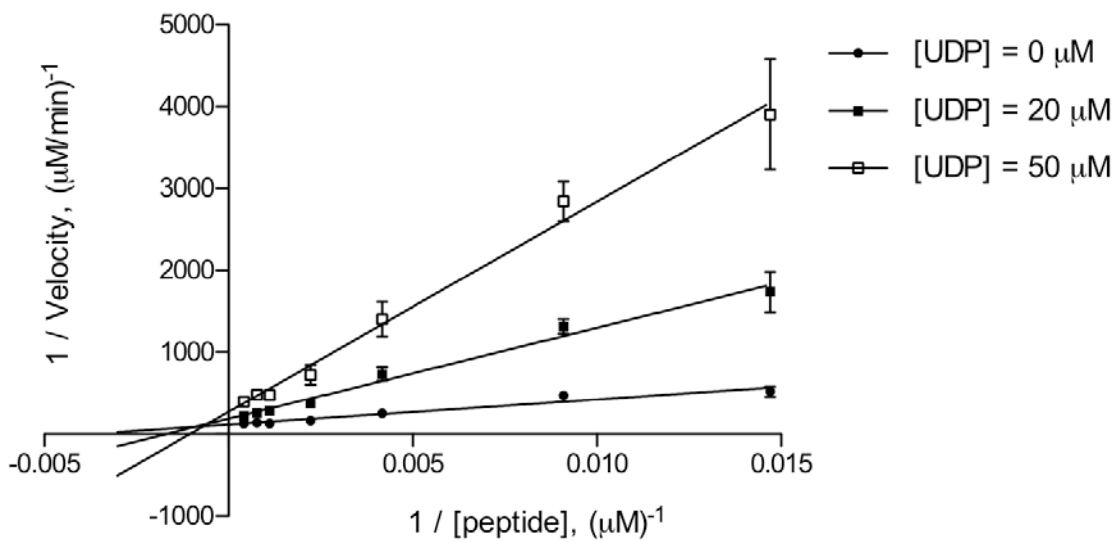

**Supplementary Figure 4. Product inhibition patterns by UDP support an ordered bi bi mechanism. a,** Double reciprocal plot showing inhibition of ncOGT by UDP at saturating peptide concentrations (Graphpad Prism5; average  $\pm$  s.e.m., n=3). Reactions were performed in the presence of UDP at saturating peptide concentrations while varying UDP-GlcNAc levels (conditions: 80 nM purified ncOGT, 3.5 mM CKII3K peptide, UDP-GlcNAc varied from 0.625 to 30  $\mu$ M, and UDP at the indicated, fixed concentrations; 30 minute incubation at room temperature). For a random bi bi mechanism at saturating peptide concentrations, no inhibition by UDP should be observed; for an ordered mechanism with UDP-GlcNAc binding first and UDP leaving last, UDP should be a competitive inhibitor with respect to UDP-GlcNAc under these conditions<sup>7,8</sup>. Linear regression analysis of the data is consistent with competitive inhibition (Vmax of  $\sim$ 0.01  $\mu$ M/min) **b,** Double reciprocal plot showing inhibition of ncOGT by UDP at unsaturating UDP-GlcNAc conditions (Graphpad Prism5; average  $\pm$  s.e.m., n=3). Reactions were performed in the presence of UDP and unsaturating UDP-GlcNAc (1.2  $\mu$ M) while varying peptide concentrations from 68  $\mu$ M to 2.4 mM. Mixed inhibition, as observed, is expected for an ordered mechanism in which UDP-GlcNAc binds first, but it is not consistent with a rapid equilibrium random mechanism<sup>7,8</sup>. For 0, 20, and 50  $\mu$ M UDP, Vmax values of 0.01, 0.006, and 0.003  $\mu$ M/min were calculated, respectively.

## Supplementary Figure 5

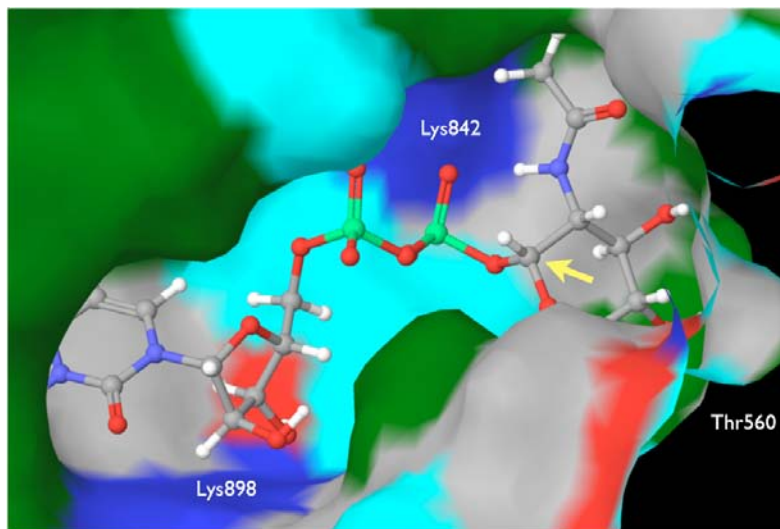

**Supplementary Figure 5. Structure of UDP-GlcNAc docked into the active site.** This fit is the highest ranking pose with a docking score of -12.785. The OGT-UDP structure was used to build energy grids using the default value of protein atom scaling (1.0) within a cubic box with sides of 24 Å. The ligand and protein were parametrized with the OPLS2001 force field. Docking calculations were performed in Extra Precision mode. Generated ligand poses were scored by GlideScore<sup>9</sup>. Residues visible in this cut away view that make critical contacts with UDP-GlcNAc are indicated. The sidechain of His901 (not shown in the cutaway) also stacks directly over the uracil and we have confirmed its importance in catalytic activity via mutagenesis (Supplementary Table 3). The anomeric carbon of the GlcNAc residue is indicated by the yellow arrow. In this conformation, the  $\beta$  face of the sugar is exposed to the peptide, consistent with the proposed mechanism involving a displacement of UDP with inversion of configuration. A lower ranking pose in which the N-acetyl group points down into the pocket is sterically feasible and is consistent with the conformation observed in a complex of a bacterial OGT homolog bound to a UDP-GlcNAc C-glycoside analog<sup>10</sup>. However, the lower ranking pose is not consistent with the enzymatic reaction or with experimental evidence that the N-acetyl group of the GlcNAc is solvent exposed<sup>2</sup>.



## Supplementary Figure 7

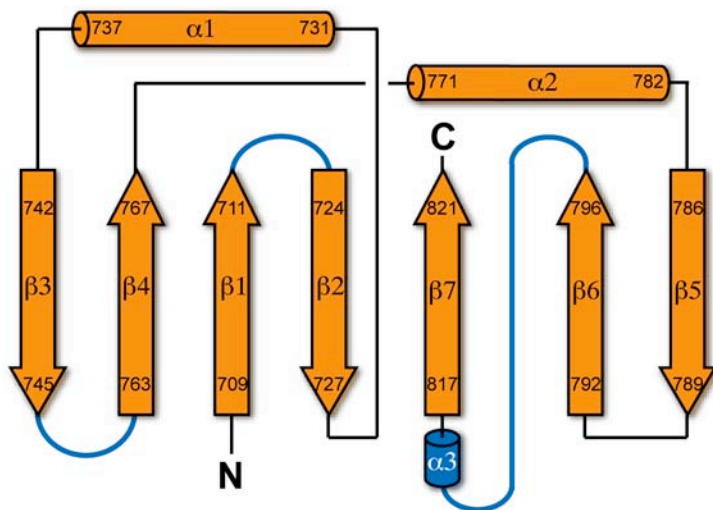

**Supplementary Figure 7. Topology diagram of the intervening domain of OGT (spanning residues 698-827, approximately).**  $\alpha$ -helices are represented by cylinders and  $\beta$ -strands are represented by arrows. Residue boundaries of secondary structure elements are numbered. The three large loops of the domain are shown in blue. In the structures, electron density is missing for twelve residues in the  $\beta$ 3- $\beta$ 4 loop and for four residues in the  $\beta$ 1- $\beta$ 2 loop.



## Supplementary Figure 8

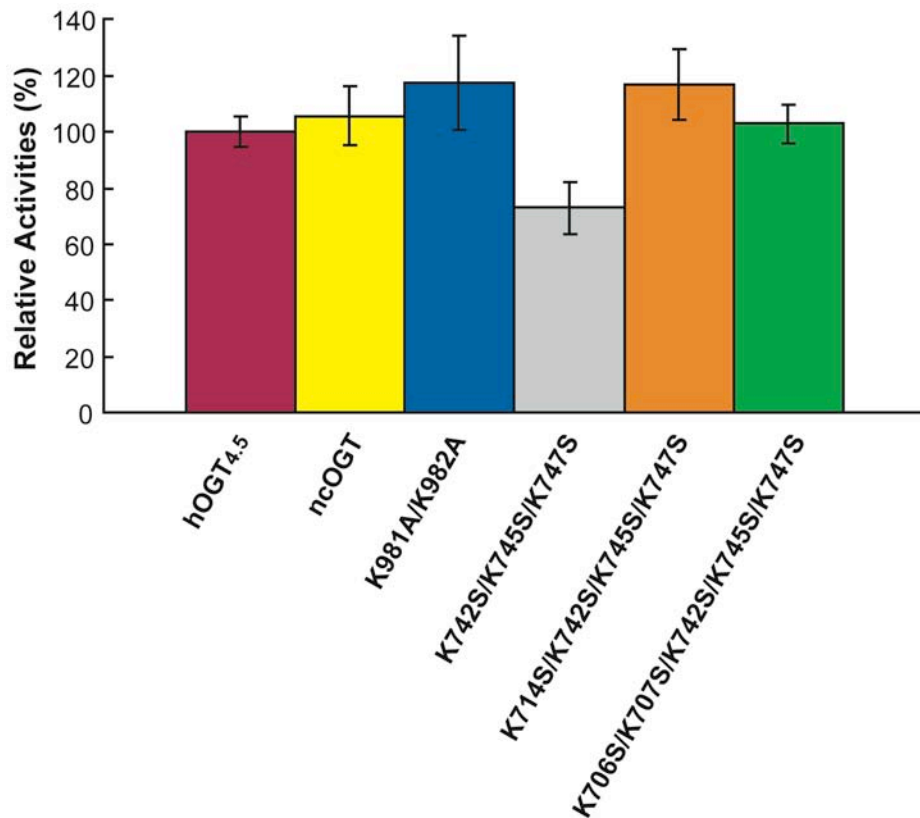

**Supplementary Figure 8. Relative activities of OGT Int-D domain mutants that contribute to the positively charged patch depicted in Figure 3b.** The activities of Int-D domain mutants listed in Supplementary Table 3 were measured using the previously reported CKII peptide filter-binding assay<sup>2</sup> (average  $\pm$  s.d., n=3). The activity of the K981/K982 mutant is consistent with previous reports<sup>11</sup>.

## Supplementary Figure 9

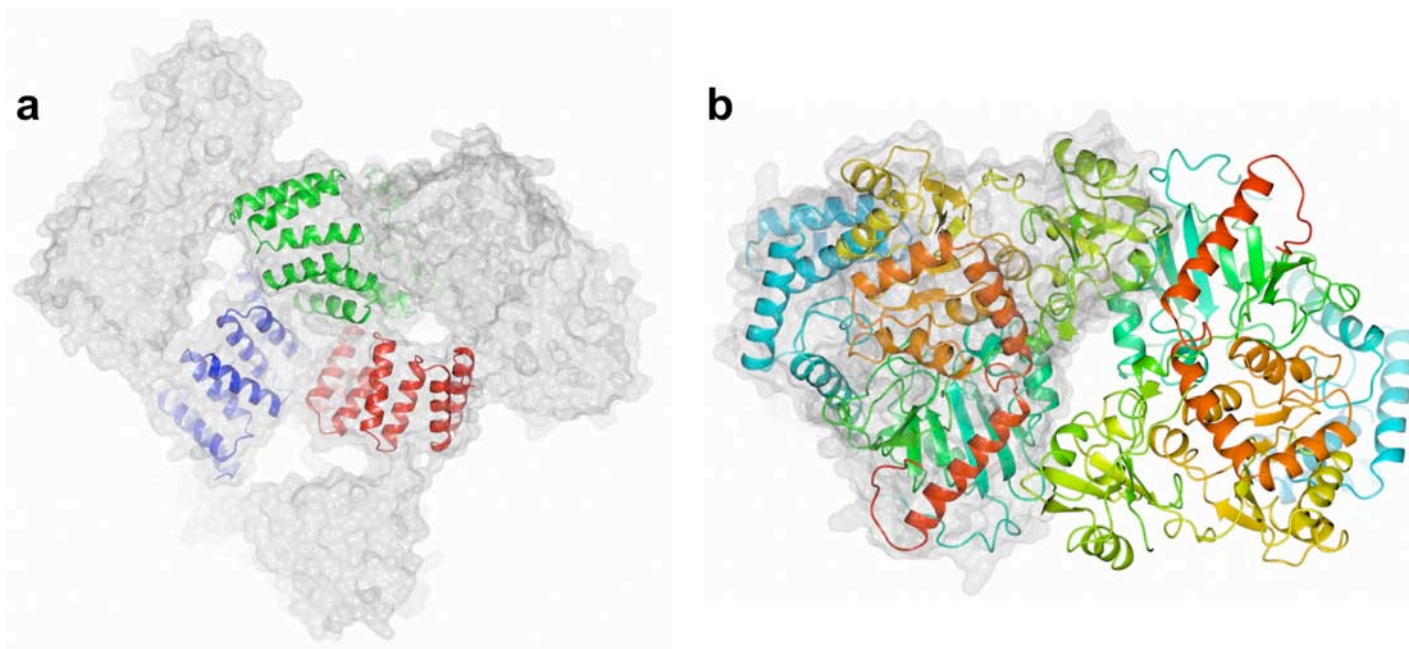

**Supplementary Figure 9. Crystal Packing Interfaces.** **a**, OGT-UDP crystal packing. OGT-UDP crystallized with four copies in the asymmetric unit in the P321 space group, but there is a threefold symmetry interface, as shown. This trimer is not relevant for the full-length protein since it would not be able to form if there were more than 4.5 TPR units. **b**, OGT-UDP-CKII crystal packing. The OGT-UDP-CKII complex crystallized in the I121 space group as a dimer, as shown. We do not interpret any of the several observed multimerization surfaces as physiologically relevant since equilibrium sedimentation ultracentrifugation experiments and gel filtration studies using the crystallization construct show that it is monomeric in solution.

## Supplementary Tables

**Supplementary Table 1. X-ray data collection and model refinement statistics of OGT-UDP and OGT-UDP-peptide complexes.**

|                                         | UDP Complex            | UDP-CKII Peptide Complex      |
|-----------------------------------------|------------------------|-------------------------------|
| <b>Data Collection Statistics</b>       |                        |                               |
| Beam Line                               | NSLS x29               | NSLS x25                      |
| Space Group                             | P321                   | I121                          |
| Wavelength (Å)                          | 1.0809                 | 1.0000                        |
| Number of Reflections                   | 154231                 | 141571                        |
| Cell dimensions                         |                        |                               |
| <i>a, b, c</i> (Å)                      | 273.66, 273.66, 143.05 | 98.54, 136.66, 153.54         |
| $\alpha, \beta, \gamma$ (°)             | 90.0, 90.0, 120.0      | 90.0, 102.90, 90.0            |
| Resolution (Å) <sup>a</sup>             | 50-2.78 (2.93 - 2.78)  | 30-1.95 (2.06-1.95)           |
| Rsymm <sup>a</sup>                      | 0.116 (0.425)          | 0.098 (0.180)                 |
| I/ $\sigma$ I <sup>a</sup>              | 8.4 (3.0)              | 8.4 (4.7)                     |
| Completeness (%) <sup>a</sup>           | 98.2 (95.1)            | 98.4 (94.5)                   |
| Redundancy <sup>a</sup>                 | 3.3 (3.1)              | 3.1 (2.8)                     |
| Average mosaicity                       | 0.47                   | 0.43                          |
| <b>Refinement Statistics</b>            |                        |                               |
| Resolution (Å)                          | 50 - 2.78              | 30-1.95                       |
| No. Reflections                         | 151011                 | 141555                        |
| Reflections (work/test)                 | 148987 / 2024          | 134456 / 7099                 |
| Rwork / Rfree %                         | 18.5 / 21.8            | 22.4 / 25.2                   |
| Number of OGT molecules/asymmetric unit | 4                      | 2                             |
| Number of modeled OGT residues/chain    | 701                    | 695 for chain A / 674 chain C |
| Number of water molecules               | 286                    | 860                           |
| Number of SO <sub>4</sub> ions          |                        | 3                             |
| Average B-Factors                       |                        |                               |
| OGT                                     | 50.0                   | 21.7                          |
| UDP                                     | 37.8                   | 9.4                           |
| Peptide                                 |                        | 20.1                          |
| Solvent                                 | 37.0                   | 24.1                          |
| R.m.s deviations                        |                        |                               |
| Bond Lengths (Å)                        | 0.003                  | 0.007                         |
| Bond Angles (°)                         | 0.707                  | 1.050                         |
| Ramachandran (number of residues / %)   |                        |                               |
| Allowed                                 | 2778 / 99.9%           | 1416 / 100.0%                 |
| Favored                                 | 2706 / 97.3 %          | 1390 / 98.2 %                 |
| Disallowed                              | 2 / 0.07 %             | 0 / 0 %                       |
| Residues in disallowed region           | Pro B859, C859         |                               |

<sup>a</sup>Values in parentheses are from highest resolution shell.

**Supplementary Table 2. X-ray data collection statistics of heavy atom derivatives.**

|                                            | Potassium platinum tetrachloride derivative | Sodium aurothiomalate derivative | Potassium platinum tetrabromide derivative | Potassium platinum tetrachloride derivative |
|--------------------------------------------|---------------------------------------------|----------------------------------|--------------------------------------------|---------------------------------------------|
| <b>Data Collection Statistics</b>          |                                             |                                  |                                            |                                             |
| Beam Line                                  | BNL x29                                     | APS ID24C                        | BNL x29                                    | BNL x29                                     |
| Space Group                                | P321                                        | P321                             | P321                                       | P321                                        |
| Wavelength (Å)                             | 1.0715                                      | 1.0384                           | 1.0715                                     | 1.0715                                      |
| Number of Reflections <sup>a</sup>         | 38280 (5632)                                | 30134 (4412)                     | 12120 (1768)                               | 92019 (13411)                               |
| Cell dimensions                            |                                             |                                  |                                            |                                             |
| <i>a, b, c</i> (Å)                         | 273.2, 273.2, 142.8                         | 274.3, 274.3, 143.0              | 271.9, 271.9, 141.9                        | 274.1, 274.1, 142.7                         |
| $\alpha, \beta, \gamma$ (°)                | 90.0, 90.0, 120.0                           | 90.0, 90.0, 120.0                | 90.0, 90.0, 120.0                          | 90.0, 90.0, 120.0                           |
| Resolution (Å) <sup>a</sup>                | 45-4.4 (4.64-4.40)                          | 42-4.8 (5.06-4.80)               | 48-6.5 (6.85-6.5)                          | 49-3.3 (3.48-3.30)                          |
| R <sub>sym</sub> <sup>a</sup>              | 0.107 (0.409)                               | 0.095 (0.382)                    | 0.072 (0.358)                              | 0.099 (0.346)                               |
| I/ $\sigma$ I <sup>a</sup>                 | 8.4 (3.5)                                   | 9.9 (4.2)                        | 15.6 (4.3)                                 | 9.7 (4.0)                                   |
| Completeness (%) <sup>a</sup>              | 98.1 (99.5)                                 | 98.8 (99.6)                      | 99.5 (100.0)                               | 99.5 (99.9)                                 |
| Redundancy <sup>a</sup>                    | 3.8 (3.8)                                   | 4.1 (4.2)                        | 5.2 (5.3)                                  | 3.9 (3.9)                                   |
| Overall isomorphous phasing power acentric | 1.27                                        | 1.16                             | 1.40                                       | 1.05                                        |
| Overall isomorphous phasing power centric  | 1.11                                        | 1.10                             | 1.02                                       | 0.74                                        |
| Overall anomalous phasing power            | 0.78                                        | 0.61                             | 1.42                                       | 0.541                                       |

<sup>a</sup>Values in parentheses are from highest resolution shell.

**Supplementary Table 3. Summary of the enzymatic activity of OGT mutants reported in the literature and made in this study.**

| <b>Mutant</b>                 | <b>&lt;10%<br/>Activity</b> | <b>10-30%<br/>Activity</b> | <b>30-60%<br/>Activity</b> | <b>60-100%<br/>activity</b> | <b>Reference</b>    |
|-------------------------------|-----------------------------|----------------------------|----------------------------|-----------------------------|---------------------|
| D431A                         |                             |                            |                            | ×                           | (10)                |
| N458A                         |                             |                            |                            | ×                           | (10)                |
| H498A                         | ×                           |                            |                            |                             | this study and (10) |
| H499A                         |                             |                            | ×                          |                             | this study          |
| D523A                         | ×                           |                            |                            |                             | (12)                |
| H558A                         | ×                           |                            |                            |                             | this study and (13) |
| R637A                         | ×                           |                            |                            |                             | (10)                |
| Q839N                         | ×                           |                            |                            |                             | (13)                |
| Y841A                         |                             |                            |                            | ×                           | (13)                |
| K842A                         | ×                           |                            |                            |                             | (13)                |
| K842M                         | ×                           |                            |                            |                             | (13)                |
| K898A                         | ×                           |                            |                            |                             | (10) and (13)       |
| H901A                         | ×                           |                            |                            |                             | this study          |
| H920A                         | ×                           |                            |                            |                             | (13)                |
| T921A                         |                             | ×                          |                            |                             | (13)                |
| D925A                         | ×                           |                            |                            |                             | (10)                |
| K981A/K982A                   |                             |                            |                            | ×                           | this study and (11) |
| K742S/K745S/K747S             |                             |                            |                            | ×                           | this study          |
| K714S/K742S/K745S/K747S       |                             |                            |                            | ×                           | this study          |
| K706S/K707S/K742S/K745S/K747S |                             |                            |                            | ×                           | this study          |

Mutants made by us were tested as described in Methods.

**Supplementary Table 4. O-GlcNAcylation sites on OGT protein substrates reported in the literature.**

| Peptide                                           | Protein Source                     | GI No.    | Ref. No. |
|---------------------------------------------------|------------------------------------|-----------|----------|
| E EKPAV <b>T</b> AAPK                             | Rat $\alpha$ -crystallin B chain   | 203613    | (14)     |
| A ERAIPV <b>S</b> REEKPSSAPSS                     | Human $\alpha$ -A-crystallin       | 2827909   | (1)      |
| F ELLP <b>T</b> PPLSPSR                           | Human c-Myc                        | 158516267 | (14)     |
| S HYGGSLPNVNQIGC                                  | Human CRTC2/TORC2                  | 32171215  | (14)     |
| L NRT <b>S</b> SDSALHTSVMNPNP                     | Human CRTC2/TORC2                  | 32171215  | (14)     |
| T VSTMPHT <b>S</b> GMNRLTQ                        | Human FoxO1                        | 9257222   | (14)     |
| Q SFPHSVK <b>T</b> THSWVSG                        | Human FoxO1                        | 9257222   | (14)     |
| S TFRPR <b>T</b> SSNASTISGRLLSP                   | Human FoxO1                        | 9257222   | (15)     |
| A PPS <b>S</b> TASASASV                           | Rat IRS-1                          | 6981106   | (14)     |
| S PGEYVNIEFGSGQPGYLAGPAT <b>S</b> RSSPSVRC        | Rat IRS-1                          | 6981106   | (16)     |
| Q SYVDTSVPAPV <b>S</b> YADMR                      | Rat IRS-1                          | 6981106   | (16)     |
| K VSLPRTTGAAPPSATAS <b>S</b> ASVTPQGAAE           | Rat IRS-1 (S1036A)                 | 6981106   | (16)     |
| Q SYVDTSPAAPV <b>S</b> YADMR                      | Human IRS-1                        | 5031805   | (16)     |
| I NPSVNP <b>G</b> ISPAHGVTR                       | Rat NCOA1/SRC-1                    | 157819661 | (14)     |
| S SRQVAH <b>S</b> GAKTSVV                         | Rat OGA                            | 16943639  | (14)     |
| C PVQLWVD <b>S</b> TPPPGTR                        | Human p53                          | 23491729  | (14)     |
| H DTSASTQSTPAS <b>S</b> RAQTLPT                   | Rat Spectrin $\beta$ 2             | 34879632  | (14)     |
| K SPVV <b>S</b> GDTSPR                            | Rat microtubule associated protein | 517394    | (17)     |
| E QVTNVGGAVV <b>T</b> GVTAQAQK                    | Rat $\alpha$ -Synuclein            | 122066261 | (17)     |
| T KEQANAV <b>S</b> EAVVSSVNTVATK                  | Rat $\gamma$ -Synuclein            | 122066261 | (17)     |
| A AA <b>E</b> KTKQGV <b>T</b> EAAEKTK             | Rat $\beta$ -Synuclein             | 77404215  | (17)     |
| T PTVVR <b>I</b> TVAPGALER                        | Rat host cell factor C1            | 213385315 | (17)     |
| E PAK <b>T</b> QPMVAAA <b>T</b> TTTTTTTTVAEK      | Rat methyl-CpGbinding protein 2    | 149029883 | (17)     |
| S MPGGSTPV <b>S</b> SANMMSGIS                     | Human CKII                         | 29570793  | (1)      |
| S PNSSPS <b>S</b> PTSPSYSP <b>S</b> SPSYSP        | Drosophila RNA polymerase II CTD   | 7292659   | (1)      |
| S YSP <b>T</b> SPNYT                              | Calf thymus RNA polymerase II      | 119911821 | (18)     |
| K YSP <b>T</b> SP <b>T</b> YSPTS                  | Calf thymus RNA polymerase II      | 119911821 | (18)     |
| L LTAQT <b>I</b> SETPSSTTTTQITKTVKGGISE           | Human Band 4.1                     | 55664328  | (1)      |
| K QAAF <b>G</b> SGPRATDKDT                        | Mouse RecQ protein-like 4          | 110815828 | (19)     |
| S PGRAPK <b>S</b> RRSVAASHEGD                     | Mouse Lamin B receptor             | 148681171 | (20)     |
| F FSSLSNAVK <b>Q</b> TAAAAATFSEQVGGGSGGA          | Rat Syn I                          | 9507159   | (20)     |
| G ATPGSAASAERA <b>S</b> TAAAPVASPAAPSPGSSG        | Rat Syn I                          | 9507159   | (20)     |
| L PSPTAAP <b>Q</b> SASQATPMTQGQGR                 | Rat Syn I                          | 9507159   | (20)     |
| R PVDQLRHLL <b>V</b> SNVGGDGEEIERFFKL             | Rat Nucleoporin 155                | 149016472 | (20)     |
| L NMAGGPAD <b>T</b> S <b>D</b> PLQQICKI           | Rat Nuclear Pore Protein p62       | 71894951  | (21)     |
| R RY <b>S</b> ECSGTQGS <b>H</b> STK               | Rat PGC-1a                         | 13786188  | (22)     |
| K FSSPIVK <b>S</b> TEANVLPP <b>S</b> SIGFTFSVPVAK | Human NUP153                       | 31418202  | (23)     |
| T ITVPV <b>S</b> GSPKMSN                          | Human EMSY                         | 9923559   | (23)     |
| Y STRSAP <b>S</b> QASLRATS                        | Human NUMA                         | 71361682  | (23)     |
| T VPSSTSK <b>D</b> SPVSQPSLVGSK                   | Human erythrocyte 65-kD protein    | 41688795  | (18)     |
| N YLAPV <b>S</b> ASVSP <b>S</b> AVSSANGTV         | Human serum response factor        | 4507205   | (18)     |
| K RRYV <b>E</b> TPRVH <b>S</b> SVRSY              | Rat neurofilament (NF-L)           | 226783    | (18)     |
| W SRGSP <b>T</b> VSSSYK                           | Rat neurofilament (NF-M)           | 56752     | (18)     |
| T HRQPSV <b>T</b> ISSKIQK                         | Rat neurofilament (NF-M)           | 56752     | (18)     |
| P PSVPV <b>S</b> GSAPGRLS                         | HHV-5 HCMV (UL32) BPP              | 270356127 | (18)     |
| S TTPTYPAVTTVYPP <b>S</b> STAKSSVSN               | HHV-5 HCMV (UL32) BPP              | 270356127 | (18)     |
| V TNLPG <b>T</b> ST <b>I</b> QTAPSTSTT            | Human serum response factor        | 4507205   | (18)     |
| Q MACQNLVDPACT <b>T</b> QSQVLSAATIVAKH            | Chicken talin                      | 26000436  | (18)     |
| G ILAN <b>Q</b> L <b>T</b> NDYGQLAQQ              | Chicken talin                      | 26000436  | (18)     |

Only sequences containing known GlcNAcylation sites have been listed. The glycosylation sites are shown in bold red.

### Supplementary Table 5. PIP binding mutants.

| Construct (in GST-ncOGT background) | Mutations introduced          |
|-------------------------------------|-------------------------------|
| WT                                  | Wildtype                      |
| Mut1                                | K981A/K982A                   |
| Mut2                                | K706S/K707S/K742S/K745S/K747S |
| Mut3                                | K714S/K742S/K745S/K747S       |
| Mut4                                | K981E/K982E/K986E/K989E       |
| Mut5                                | K742E/K745E/K747E             |

The listed point mutations were introduced into full-length ncOGT fused to N-terminal glutathione-S-transferase (GST). The wildtype and mutant constructs were tested for binding to commercially available PIP arrays as described in Methods. Wildtype GST-ncOGT binds to PtdIns(3,4,5)P<sub>3</sub>, as previously described<sup>11</sup>, although we observed that it also binds to PtdIns(3,4)P<sub>2</sub>, PtdIns(3,5)P<sub>2</sub>, PtdIns(4,5)P<sub>2</sub>, and phosphatidic acid. The mutants, including the previously reported K981A/K982A mutant, showed similar binding behavior as GST-ncOGT in PIP binding assays under the assay conditions (see Methods). Removal of the GST domain abrogated binding of the wildtype ncOGT to the PIP arrays, indicating that binding is GST-dependent. Since full experimental details were not described in the previously reported studies, we cannot compare our results to those directly.

**Supplementary Table 6.** Primers used to make OGT mutants in this study.

| <b>Primer</b>             | <b>Sequence (5' to 3')</b>                                |
|---------------------------|-----------------------------------------------------------|
| H498A forward             | CACCCGGCTCACTCTATGCTGTACCCGCTGTCTCACGG                    |
| H498A reverse             | TAGAGTGAGCCGGGTGAACAGACGGCAGACGGTTTTTTTCC                 |
| H499A forward             | GCACGTTCTATGCTGTACCCGCTGTCTCACGG                          |
| H499A reverse             | TAGAAGCGTGCGGGTGAACAGACGGCAGACGG                          |
| H558A forward             | TAACGCTCCGACCTCTCACCTGATGCAGTCTATCC                       |
| H558A reverse             | TCGGAGCGTTACCGAAGTCAGAAGAAACGTAACC                        |
| H901A forward             | AGAAGCTGTTCGTTCGTGGTCAGCTGGCTGACGTTTGC                    |
| H901A reverse             | ACGAACAGCTTCTTCTTTCGGAGCAACCGGAGAGAAGATG                  |
| K981A/K982A forward       | CCTGGCTGCTGTTTCGTGGTAAAGTTTGAAACAGC                       |
| K981A/K982A reverse       | GAACAGCAGCCAGGTATTCCAGGTTCGGTACCCAG                       |
| K742S/K457S/K747S forward | CGTTTCTATCGTTTCTATGTCTTGCCCGGACGGCGGTGACAACGCTG           |
| K742S/K457S/K747S reverse | GGCAAGACATAGAAACGATAGAAACGTCGGCAGAGAGTCCA GGAAAGC         |
| K706S/K707S forward       | CACCTGTCTTCTAAAGCTGTTATCGACTTCAAATCTAACGG                 |
| K706S/K707S reverse       | CTTTAGAAGACAGGTGCGGGAACATGTTAGCGTGGTC                     |
| K714S forward             | GACTTCTTCTAACGGTCACATCTACGACAACCGTATC                     |
| K714S reverse             | GTTAGAAGAGAAGTCGATAACAGCTTTTTTTTTCAGGTGC                  |
| 4.5TPR_HRV_site forward   | TCCGCTGGAAGTTTTGTTCCAAGTCCGGGTTCTTGCCCGACCCACGCTGACTCTCTG |
| 4.5TPR_HRV_site reverse   | GGCAAGAACCCGGACCTTGGAACAAAACCTCCAGCGGATCCCGACCCATTGCTGTCC |
| 8His forward              | TCCGCACCATCACCATCACCATCACCACCTGGAAGTTTTGTTCCAAGGTCCG      |
| 8His reverse              | CCAGGTGGTGATGGTGATGGTGATGGTGCGGATCCCGACCCATTGCTGTCCAC     |
| C term_no_His forward     | TGAATAACACCACCACCACCACCACCACCTAATTG                       |
| C term_no_His reverse     | GGTGGTGTATTCAACCGGTTAATCATGTGGTCCGG                       |

**Supplementary Movie 1. Molecular dynamics simulations of OGT.** This movie is based on a 1 microsecond simulation and shows the global movement of the TPRs based on motion of the hinge described in Supplementary Figure 3.

**Coordinate Models.** The following models are available for download from the Walker lab web site (<http://www.chem.harvard.edu/groups/walker/ogt.htm>).

**Model 1. PDB coordinates for the model of ncOGT bound to UDP.** As described in the caption of Fig. 3c, this full-length model was prepared by combining our OGT-UDP structure (PDB code 3PE3) with the OGT TPR structure (PDB code 1W3B).

**Model 2. PDB coordinates for the model of ncOGT bound to UDP and the CKII peptide.** Model of the full length OGT-UDP-peptide structure assembled from our complex structure (PDB code 3PE4) and the OGT TPR structure (PDB code 1W3B).

**Model 3. PDB coordinates for the model of UDP-GlcNAc docked into hOGT4.5.** UDP-GlcNAc was docked into the OGT-UDP structure (see Supplementary Fig. 5).



## References

1. Kreppel, L.K. & Hart, G.W. Regulation of a cytosolic and nuclear O-GlcNAc transferase. Role of the tetratricopeptide repeats. *J Biol Chem* **274**, 32015-22 (1999).
2. Gross, B.J., Kraybill, B.C. & Walker, S. Discovery of O-GlcNAc transferase inhibitors. *J Am Chem Soc* **127**, 14588-9 (2005).
3. Lubas, W.A. & Hanover, J.A. Functional expression of O-linked GlcNAc transferase. Domain structure and substrate specificity. *J Biol Chem* **275**, 10983-8 (2000).
4. Larkin, M.A. et al. Clustal W and Clustal X version 2.0. *Bioinformatics* **23**, 2947-8 (2007).
5. Gorodkin, J., Heyer, L.J., Brunak, S. & Stormo, G.D. Displaying the information contents of structural RNA alignments: the structure logos. *Comput Appl Biosci* **13**, 583-6 (1997).
6. Schneider, T.D. & Stephens, R.M. Sequence logos: a new way to display consensus sequences. *Nucleic Acids Res* **18**, 6097-100 (1990).
7. Segel, I.H. *Enzyme kinetics : behavior and analysis of rapid equilibrium and steady state enzyme systems*, xxii, 957 p. (Wiley, New York, 1975).
8. Copeland, R.A. *Enzymes : a practical introduction to structure, mechanism, and data analysis*, xvi, 397 p. (Wiley, New York, 2000).
9. Schrödinger Software Suite. (Schrodinger LLC, New York, 2006).
10. Clarke, A.J. et al. Structural insights into mechanism and specificity of O-GlcNAc transferase. *Embo J* **27**, 2780-8 (2008).
11. Yang, X. et al. Phosphoinositide signalling links O-GlcNAc transferase to insulin resistance. *Nature* **451**, 964-9 (2008).
12. Lazarus, B.D., Roos, M.D. & Hanover, J.A. Mutational analysis of the catalytic domain of O-linked N-acetylglucosaminyl transferase. *J Biol Chem* **280**, 35537-44 (2005).
13. Martinez-Fleites, C. et al. Structure of an O-GlcNAc transferase homolog provides insight into intracellular glycosylation. *Nat Struct Mol Biol* **15**, 764-5 (2008).
14. Copeland, R.J., Bullen, J.W. & Hart, G.W. Cross-talk between GlcNAcylation and phosphorylation: roles in insulin resistance and glucose toxicity. *Am J Physiol Endocrinol Metab* **295**, E17-28 (2008).
15. Housley, M.P. et al. O-GlcNAc regulates FoxO activation in response to glucose. *J Biol Chem* **283**, 16283-92 (2008).
16. Klein, A.L., Berkaw, M.N., Buse, M.G. & Ball, L.E. O-linked N-acetylglucosamine modification of insulin receptor substrate-1 occurs in close proximity to multiple SH2 domain binding motifs. *Mol Cell Proteomics* **8**, 2733-45 (2009).
17. Wang, Z. et al. Enrichment and site mapping of O-linked N-acetylglucosamine by a combination of chemical/enzymatic tagging, photochemical cleavage, and electron transfer dissociation mass spectrometry. *Mol Cell Proteomics* **9**, 153-60 (2010).
18. Hart, G.W. & Akimoto, Y. The O-GlcNAc modification. *Essentials of glycobiology*, chapter 18.
19. Khidekel, N. et al. Probing the dynamics of O-GlcNAc glycosylation in the brain using quantitative proteomics. *Nat Chem Biol* **3**, 339-48 (2007).
20. Wells, L. et al. Mapping sites of O-GlcNAc modification using affinity tags for serine and threonine post-translational modifications. *Mol Cell Proteomics* **1**, 791-804 (2002).
21. Lubas, W.A., Smith, M., Starr, C.M. & Hanover, J.A. Analysis of nuclear pore protein p62 glycosylation. *Biochemistry* **34**, 1686-94 (1995).
22. Housley, M.P. et al. A PGC-1alpha-O-GlcNAc transferase complex regulates FoxO transcription factor activity in response to glucose. *J Biol Chem* **284**, 5148-57 (2009).
23. Wang, Z. et al. Extensive crosstalk between O-GlcNAcylation and phosphorylation regulates cytokinesis. *Sci Signal* **3**, ra2 (2010).
